# Supplementary material
Source: PubMed Central journal article supplement (PMC4205000)
Supplement: bc500380r_si_001.pdf [file bc500380r_si_001.pdf]

# **Protein-Polymer Conjugation *via* Ligand Affinity and Photoactivation of Glutathione *S*-Transferase**

*En-Wei Lin, Natalie Boehnke, Heather D. Maynard\**

Department of Chemistry & Biochemistry and the California NanoSystems Institute,  
University of California, Los Angeles, 607 Charles E. Young Drive East, Los Angeles,  
CA, 90095, USA

## **Supporting Information**

### Scheme S1. Synthesis of GSH-BP.

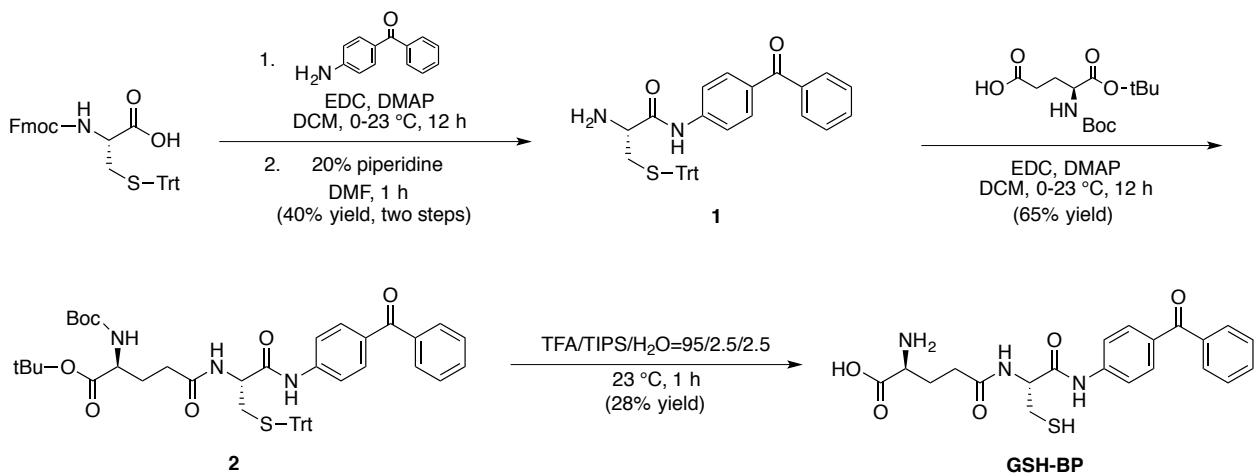

**Synthesis of 1.** In a round bottom flask over ice, Fmoc-Cys(Trt)-OH (1.63 g, 2.79 mmol) was dissolved in anhydrous DCM (5 mL) and stirred to dissolve. 1-Ethyl-3-(3-dimethylaminopropyl)carbodiimide hydrochloride (EDC·HCl, 0.97 g, 5.07 mmol) was then added to the reaction mixture. In a separate flask, 4-aminobenzophenone (4-ABP, 0.51 g, 2.58 mmol) was dissolved in anhydrous DCM (5 mL). After keeping in an ice bath for 20 min, the 4-ABP solution was added dropwise to the reaction flask. 4-Dimethylaminopyridine (DMAP, 61.4 mg, 0.5 mmol) was then added, and the reaction was stirred from 0 °C to 23 °C for 12 h. The completion of the reaction was confirmed by thin layer chromatography (TLC, EtOAc:Hexanes=1:2, stained with ninhydrin). The crude mixture was washed with saturated NaHCO<sub>3</sub> three times. The organic layer was then dried over MgSO<sub>4</sub> and concentrated *in vacuo*. 20% piperidine in DMF (11 mL) was added to the crude solid, and allowed to stir at 23 °C for 1 h. The solvent was removed *in vacuo* at 40 °C. The crude product was purified via silica gel flash chromatography with EtOAc : Hexane = 1 : 2, then changed to DCM : MeOH = 95 : 5 to obtain **1** with 40% yield containing impurities, and was brought forward to the next step. <sup>1</sup>H NMR (500

MHz in MeOD)  $\delta$ : 7.81-7.14 (m, 24H), 3.44-3.41 (t,  $J$ = 6.15 Hz, 1H), 2.67-2.46 (m, 2H).  $^{13}\text{C}$  NMR (500 MHz in MeOD)  $\delta$ : 196.25, 172.80, 144.60, 142.37, 137.77, 132.63, 132.17, 131.10, 129.48, 129.35, 128.09, 127.61, 126.52, 118.84, 118.15, 116.98 66.44, 54.71, 36.85. DART-MS ( $\pm$  1.0) observed (predicted):  $\text{H}^+$  543.2064 (543.2062).

***Synthesis of Protected GSH-BP 2.*** In a round bottom flask over ice, Boc-Glu-OtBu (93.9 mg, 0.31 mmol) was dissolved in anhydrous DCM (2 mL) and stirred to dissolve. EDC·HCl (98.9 mg, 0.52 mmol) was then added to the reaction mixture. In a separate flask, **1** (140 mg, 0.26 mmol) was dissolved in anhydrous DCM (2 mL). After keeping over ice for 20 min, the solution of **1** was added dropwise to the reaction flask. DMAP (5.8 mg, 0.05 mmol) was then added, and the reaction was stirred from 0 °C to 23 °C for 24 h. The crude mixture was washed with saturated  $\text{NaHCO}_3$  three times. The organic layer was then dried over  $\text{MgSO}_4$  and concentrated *in vacuo*. The crude product was purified using silica gel flash chromatography with EtOAc : Hexane = 1 : 2 to obtain 140 mg white solid with 65% yield containing slight amount of impurities.  $^1\text{H}$  NMR (500 MHz in MeOD)  $\delta$ : 7.81-7.16 (m, 24H), 4.49-4.46 (m, 1H), 4.03-3.84 (m, 1H), 2.71-2.49 (m, 2H), 2.41-2.26 (m, 2H), 2.16-1.77 (m, 2H), 1.52-1.36 (m, 18H).  $^{13}\text{C}$  NMR (500 MHz in MeOD)  $\delta$ : 197.51, 174.77, 173.14, 170.96, 158.09, 145.82, 143.80, 139.90, 134.29, 134.05, 133.53, 132.50, 132.39, 130.82, 130.68, 130.31, 129.47, 129.22, 129.03, 127.94, 120.47, 120.38, 114.07, 82.75, 80.54, 68.00, 55.34, 55.25, 54.64, 54.52, 34.89, 32.86, 28.73, 28.58, 28.24. IR:  $\nu$  = 3292, 2972, 1703, 1652, 1595, 1522, 1445, 1366, 1310, 1278, 1251, 1149, 1047, 923, 845, 741. ESI-MS ( $\pm$  1.0) observed (predicted):  $\text{H}^+$  828.3785 (828.3638).

**Synthesis of GSH-BP.** Protected GSH-BP **2** (41.5 mg, 0.05 mmol) was weighed in a glass vial. Under argon, trifluoroacetic acid (TFA, 1.33 mL), triisopropylsilane (TIPS, 35  $\mu$ L, 0.17 mmol), and H<sub>2</sub>O (35  $\mu$ L) were added to the reaction with a final ratio of TFA/TIPS/H<sub>2</sub>O = 95/2.5/2.5. Upon the addition of TFA, the solution immediately turned bright yellow. After the addition of TIPS, the color quickly turned pale yellow with the formation of a white precipitate. The reaction was allowed to stir for 1 h at 23 °C and then dried *in vacuo* to remove TFA. The solid was dissolved in 30% acetonitrile (ACN) and filtered for HPLC purification. HPLC chromatography was carried out with a gradient elution from 30% to 70% ACN in 30 min with a flow rate of 10 mL/min. The collected fractions were lyophilized to obtain 6.1 mg white solid with 28% yield. <sup>1</sup>H NMR (500 MHz in MeOD)  $\delta$ : 7.79-7.51 (m, 9H), 4.67-4.58 (m, 1H), 3.70-3.58 (m, 1H), 3.04-2.83 (m, 2H), 2.56-2.53 (t,  $J$  = 7.13 Hz, 2H), 2.22-2.07 (m, 2H). <sup>13</sup>C NMR (500 MHz in MeOD)  $\delta$ : 196.16, 173.88, 172.48, 169.69, 142.55, 137.73, 132.71, 132.17, 130.99, 129.41, 128.10, 119.06, 56.77, 54.20, 31.31, 26.36, 25.33. IR:  $\nu$  = 3293, 2977, 1645, 1595, 1517, 1446, 1407, 1365, 1311, 1279, 1252, 1174, 1149, 1047, 938, 924, 851, 793, 741. ESI-MS ( $\pm$  1.0) observed (predicted): H<sup>+</sup> 430.1450 (430.1392). UV-Vis (MeOH)  $\lambda_{\text{max}}$  = 295 nm.

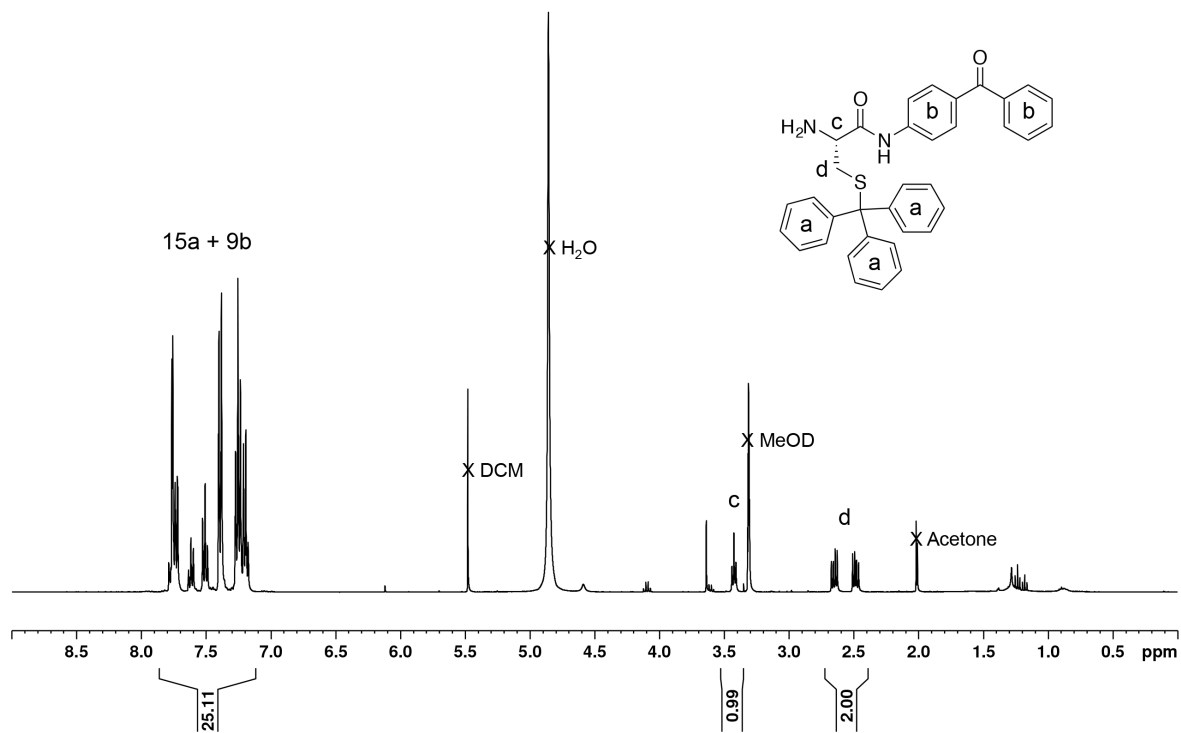

**Figure S1.**  $^1\text{H}$  NMR spectrum of **1** (in  $\text{MeOD}$ ).

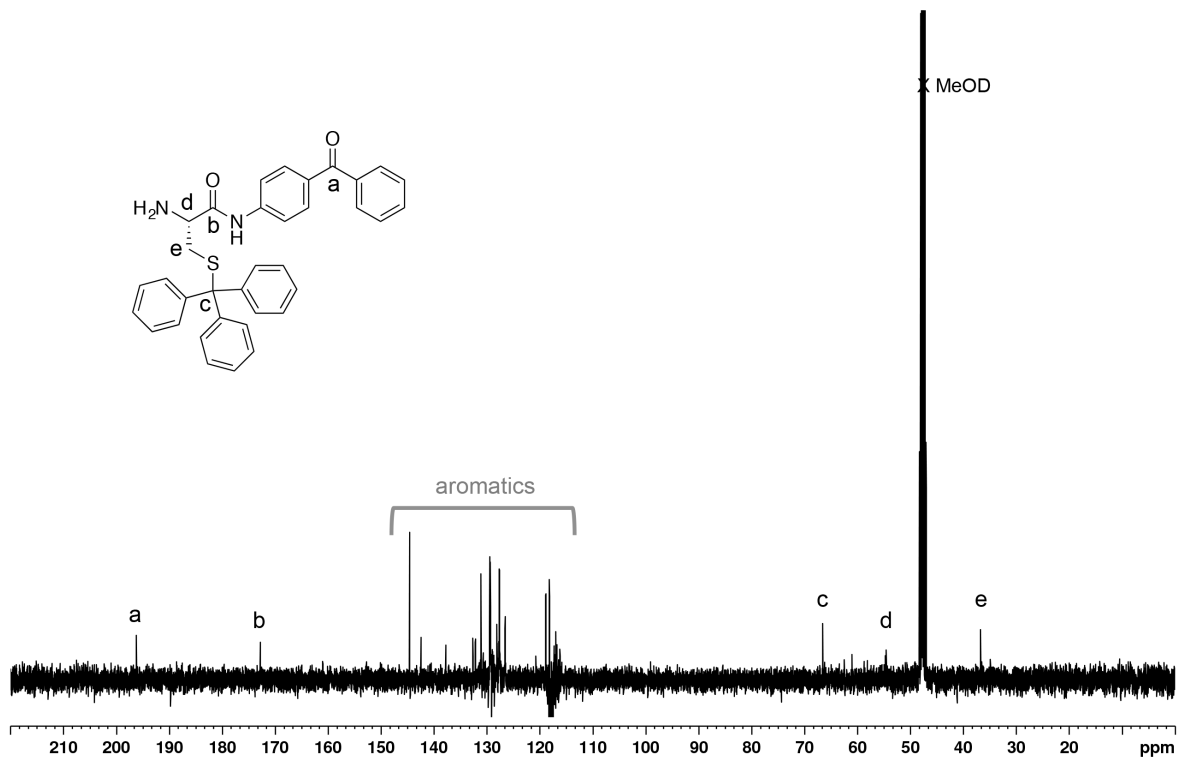

**Figure S2.**  $^{13}\text{C}$  NMR spectrum of 1 (in MeOD).

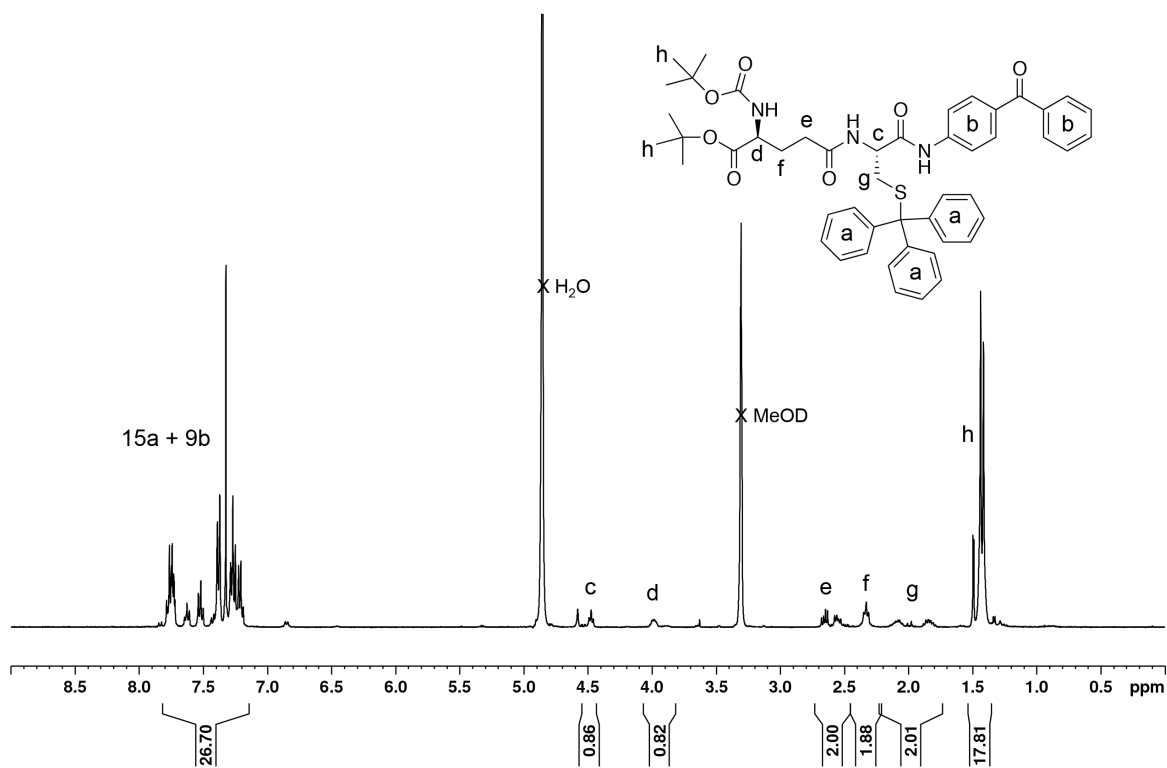

**Figure S3.**  $^1\text{H}$  NMR spectrum of **2** (in  $\text{MeOD}$ ).

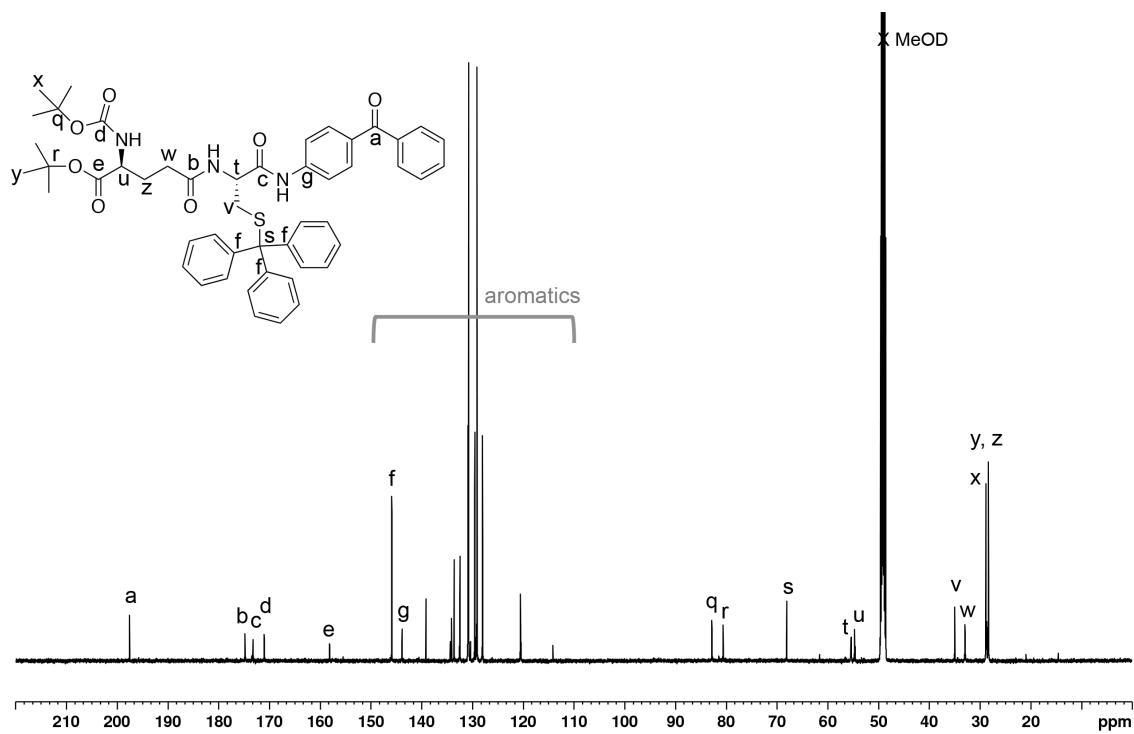

**Figure S4.**  $^{13}\text{C}$  NMR spectrum of **2** (in MeOD).



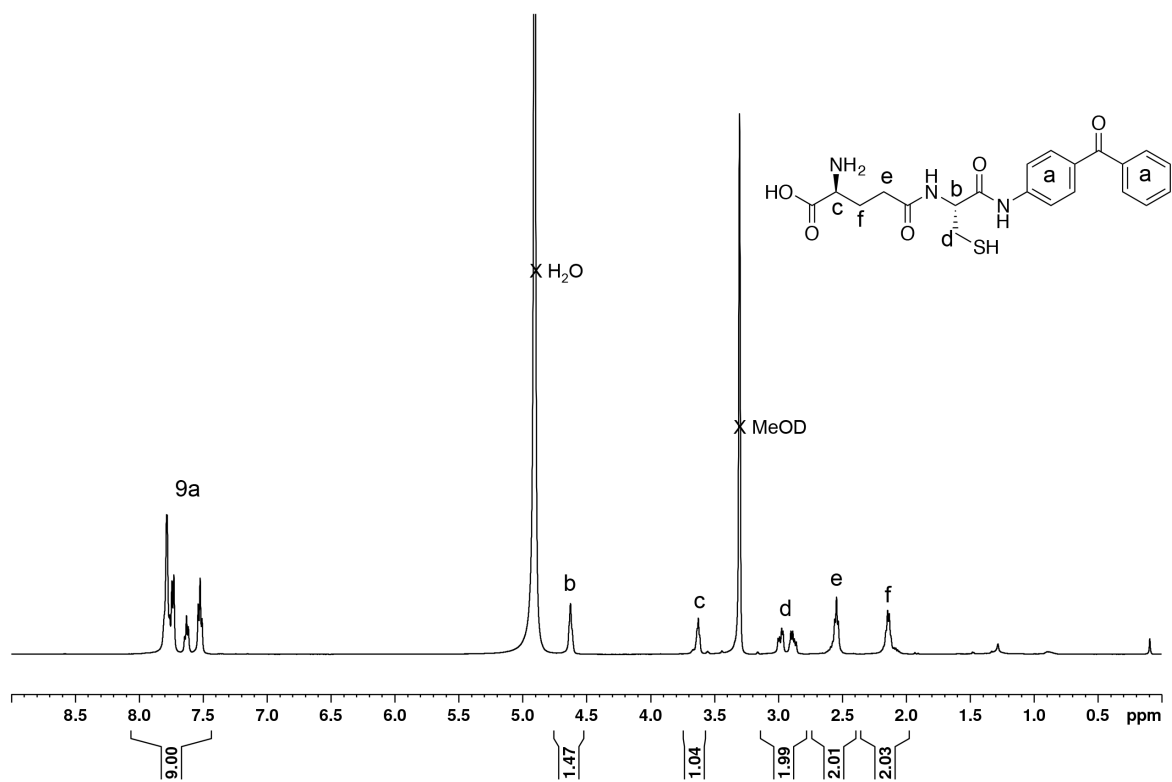

**Figure S5.** <sup>1</sup>H NMR spectrum of **3** (in MeOD).

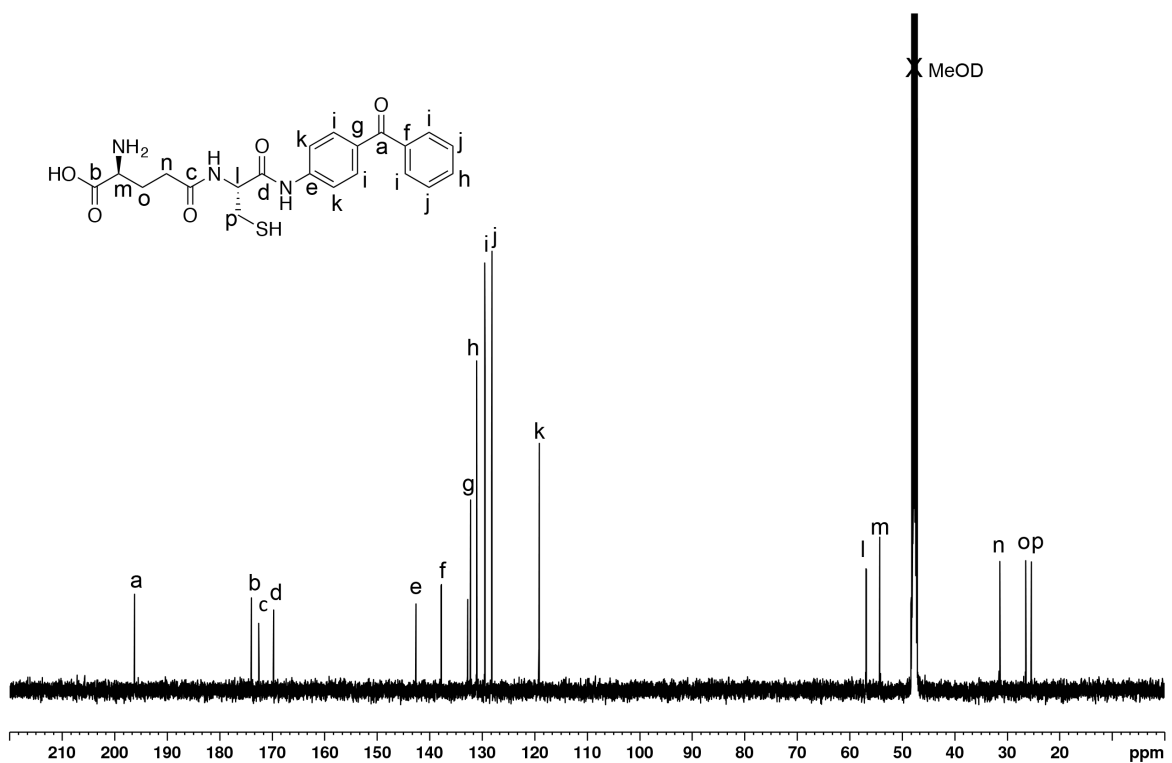

**Figure S6.**  $^{13}\text{C}$  NMR spectrum of **3** (in MeOD).

**Scheme S2.** Synthesis of GSH-DA.

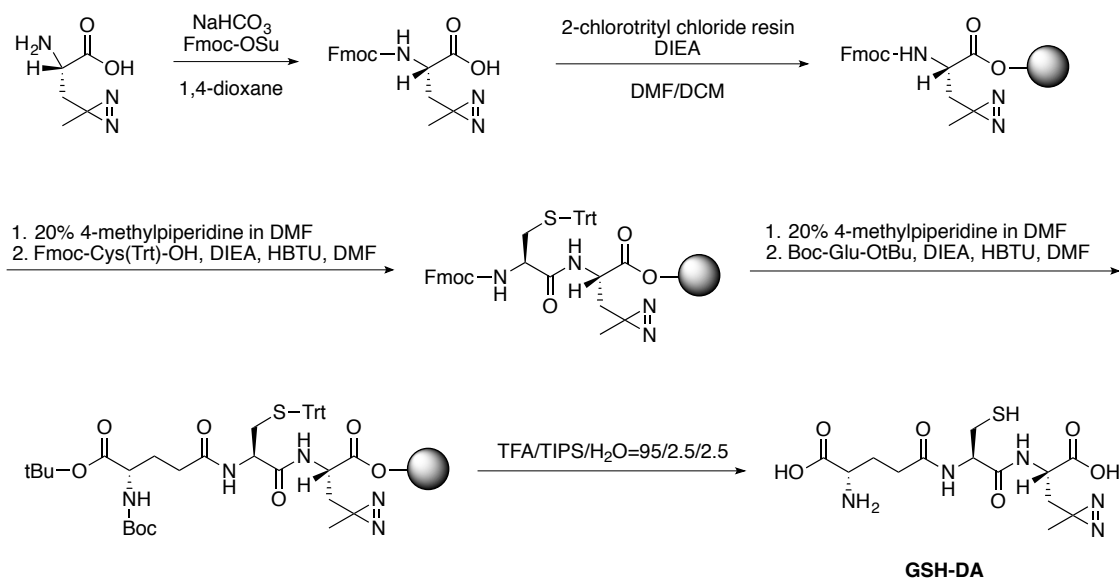

**Synthesis of Fmoc-PhotoLeu.** Fmoc-PhotoLeu was synthesized using a previously reported procedure.<sup>1</sup> Fmoc-OSu (118 mg, 0.35 mmol) was dissolved in 1,4-dioxane (2 mL). L-Photo-Leucine (50 mg, 0.35 mmol) and NaHCO<sub>3</sub> (47 mg, 0.56 mmol) were dissolved in H<sub>2</sub>O (1.5 mL). 1,4-dioxane (2.5 mL) was added to this solution before adding Fmoc-OSu solution over 15 minutes. The reaction was then stirred for 26 hours at 23°C. HCl was added to the solution to acidify to pH 3 before extracting 3 times into EtOAc. Organic layers were combined and dried over MgSO<sub>4</sub> and concentrated *in vacuo*. Silica gel chromatography (5% MeOH in CH<sub>2</sub>Cl<sub>2</sub> + 0.1% AcOH) yielded 107 mg (85%) as a beige solid. All steps were carried out in the dark. <sup>1</sup>H NMR (500 MHz in MeOD) δ: 7.81-7.63 (d, *J*= 7.5 Hz, 2H), 7.74-7.68 (dd, *J*= 4.6, 7.0 Hz, 2H), 7.41-7.34 (t, *J*= 7.5 Hz, 2H), 7.33-7.27 (dt, *J*= 1.05, 7.5 Hz, 2H), 4.42-4.30 (m, 2H), 4.28-4.22 (t, *J*= 7.15 Hz, 1H), 4.15-4.07 (dd, *J*= 4.3, 10.5 Hz, 1H), 2.03-1.95 (dd, *J*= 4.4, 14.95 Hz, 1H), 1.67-1.59 (dd, *J*= 10.6, 14.95 Hz, 1H), 1.06-1.00 and 0.93-0.89 (s, rotamer, 3H). <sup>13</sup>C NMR (500 MHz in MeOD) δ: 173.39, 157.04, 143.81, 141.18, 127.38, 126.76, 124.94, 119.50, 66.70, 50.10, 36.19, 23.60, 18.48.

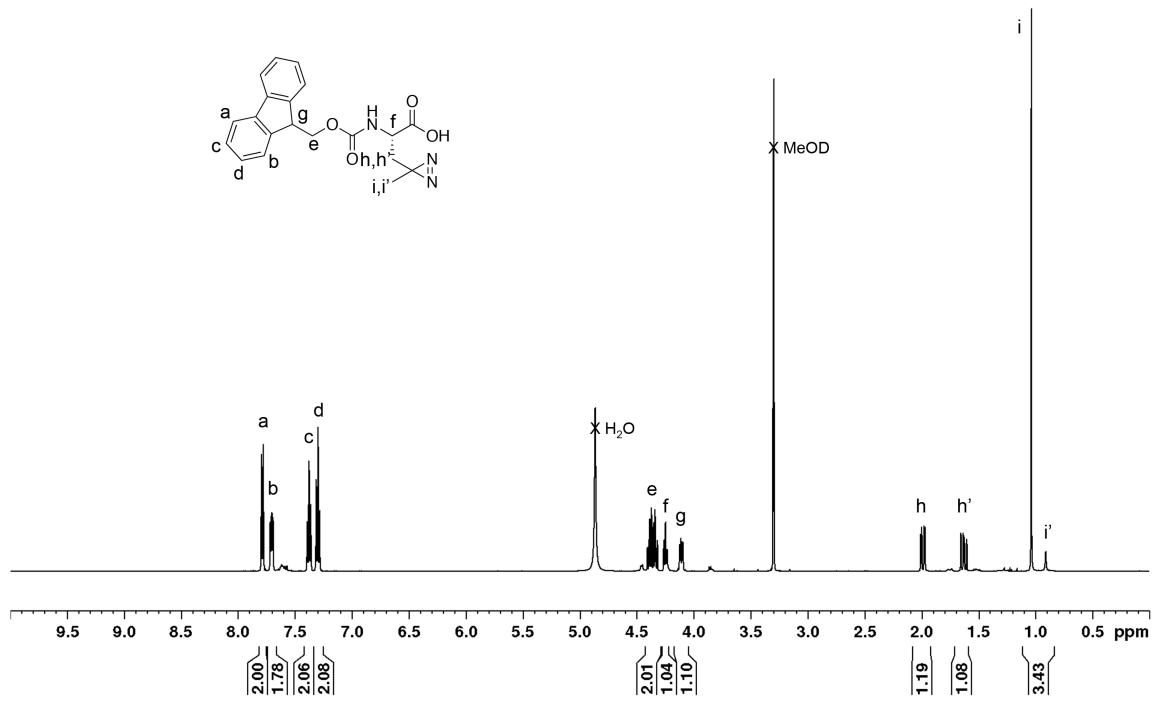

**Figure S7.**  $^1\text{H}$  NMR spectrum of Fmoc-photo-Leucine (in MeOD).

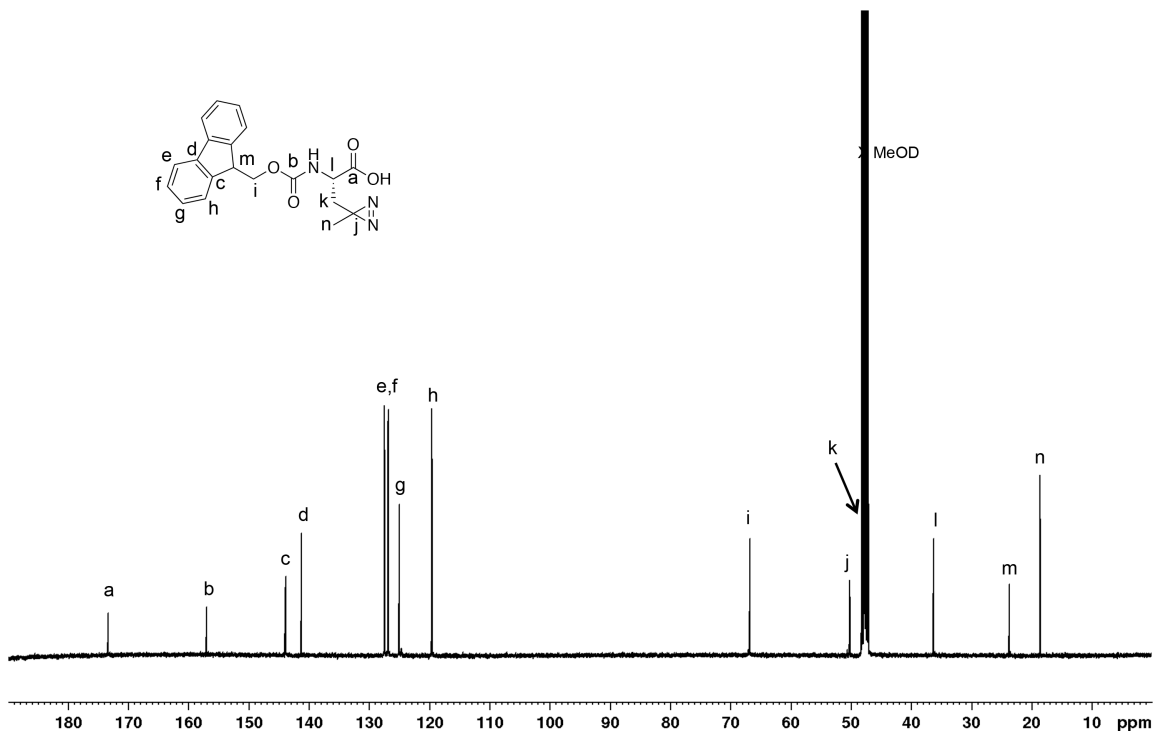

**Figure S8.**  $^{13}\text{C}$  NMR spectrum of Fmoc-photo-Leucine (in MeOD). Note: It is anticipated that the carbon peak k is under the MeOD peak.

### ***Synthesis of GSH-DA:***

***Resin Loading.***<sup>2</sup> Fmoc-PhotoLeu (106 mg, 0.29 mmol) and DIEA (202  $\mu\text{L}$ , 1.2 mmol) were dissolved in anhydrous DCM (2 mL). A small amount of DMF (200  $\mu\text{L}$ ) was added to dissolve the acid. The solution was added to the 2-chlorotrityl chloride resin (219 mg, .29 mmol) and mixed for 45 minutes in a peptide synthesis flask. The solution was drained and resin was rinsed with DCM/MeOH/DIEA (17:2:1), DCM, DMF, DCM, MeOH, DCM, DMF. The loaded resin was stored under argon until further use.

**Amino Acid Coupling.** 20% 4-methyl piperidine in DMF (10 mL) was added to resin in synthesis flask for 20 minutes to remove the Fmoc group. Solution was drained and resin was washed with DMF/DCM/MeOH/DCM/DMF. Fmoc-Cys(Trt)-OH (250 mg, 0.38 mmol) and HBTU (161 mg, 0.42 mmol) were dissolved in DMF (10 mL) and DIEA (148  $\mu$ L, 1.5 mmol) was added before adding solution to resin and mixing for 3 hours at 23°C. Solution was drained and resin was washed again. The Fmoc group was removed as described previously. Boc-Glu-OtBu (129 mg, 0.41 mmol) and HBTU (161 mg, 0.42mmol) were dissolved in DMF (10 mL) before adding DIEA (148  $\mu$ L, 1.5 mmol). This solution was added to resin and mixed at 23°C for 2 hours before draining solution and washing the resin.

**Peptide Cleavage.** The peptide was cleaved from the chlorotriyl resin using 95% TFA, 2.5% TIPS and 2.5% H<sub>2</sub>O. The resin was mixed in cleavage cocktail for 45 minutes before draining the solution and rinsing the resin with DCM twice. The filtrate was concentrated *in vacuo* before precipitating in cold diethyl ether. The crude peptide was purified using HPLC with a C18 column with a gradient elution from 5% to 95% ACN in 30 min with a flow rate of 10 mL/min. The trityl group was subsequently deprotected using a solution of 95% TFA, 2.5% TIPS and 2.5% H<sub>2</sub>O to yield 16.7 mg of pure GSH-DA as a white solid after precipitation in cold diethyl ether. ESI-MS ( $\pm$  1.0) observed (predicted): H<sup>+</sup> 376.1289 (376.1291).

**Scheme S3.** Synthesis of VS-PEG.

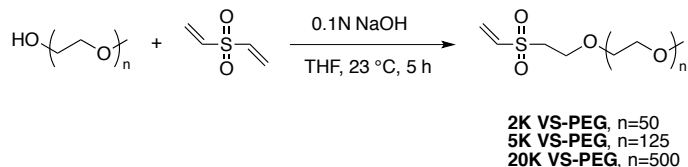

**Synthesis of VS-PEG.** Here, we describe the synthesis of 2K VS-PEG. 5K and 20K VS-PEG were prepared according to this same method modified from a previous report.<sup>3</sup> To poly(ethylene glycol) methyl ether of average  $M_n \sim 2,000$  (1.32 g, 0.66 mmol), THF (35 mL) was added and warmed to 30 °C. After the polymer had dissolved, the solution was cooled down to room temperature. Divinyl sulfone (0.2 mL, 1.98 mmol) was added, followed by addition of 0.1 N aqueous NaOH solution (2.4 mL). The reaction mixture was stirred at 23 °C for 5 h, then neutralized with 0.1 N HCl solution (2.4 mL) and filtered. The filtrate was concentrated *in vacuo* to remove most of the THF. The residual solution was diluted in approximately 10 mL of H<sub>2</sub>O, washed with diethyl ether (x3 times), and extracted with chloroform (x3 times). The organic layer was then washed with H<sub>2</sub>O, dried over MgSO<sub>4</sub>, and concentrated *in vacuo*. The white solid was then dissolved in minimum amount of DCM, and precipitated into cold ether (50 mL x3). The precipitant was dried *in vacuo* to obtain 1.1 g of white powder with 79% yield. <sup>1</sup>H NMR of 2K VS-PEG (500 MHz in CDCl<sub>3</sub>) (conversion: 89%)  $\delta$ : 6.86-6.79 (dd,  $J= 9.95, 16.60$  Hz, 1H), 6.42-6.36 (d,  $J= 16.65$  Hz, 1H), 6.11-6.06 (d,  $J= 9.90$  Hz, 1H), 4.00-3.22 (m, 200H), 3.40-3.37 (s, 3H). <sup>1</sup>H NMR of 5K VS-PEG (500 MHz in CDCl<sub>3</sub>) (conversion: 85%)  $\delta$ : 6.84-6.76 (dd,  $J= 9.90, 16.65$  Hz, 1H), 6.40-6.34 (d,  $J= 16.65$  Hz, 1H), 6.09-6.04 (d,  $J= 9.90$  Hz, 1H), 3.96-3.20 (m, 500H), 3.37-3.34 (s, 3H). <sup>1</sup>H NMR of 20K VS-PEG (500 MHz in CDCl<sub>3</sub>) (conversion: 90%)  $\delta$ : 6.83-6.75 (dd,  $J= 10.00, 16.65$  Hz, 1H), 6.38-

6.32 (d,  $J= 16.75$  Hz, 1H), 6.07-6.03 (d,  $J= 10.00$  Hz, 1H), 3.95-3.19 (m, 2000H), 3.36-3.33 (s, 3H).

**Scheme S4.** Synthesis of GSBP-PEG.

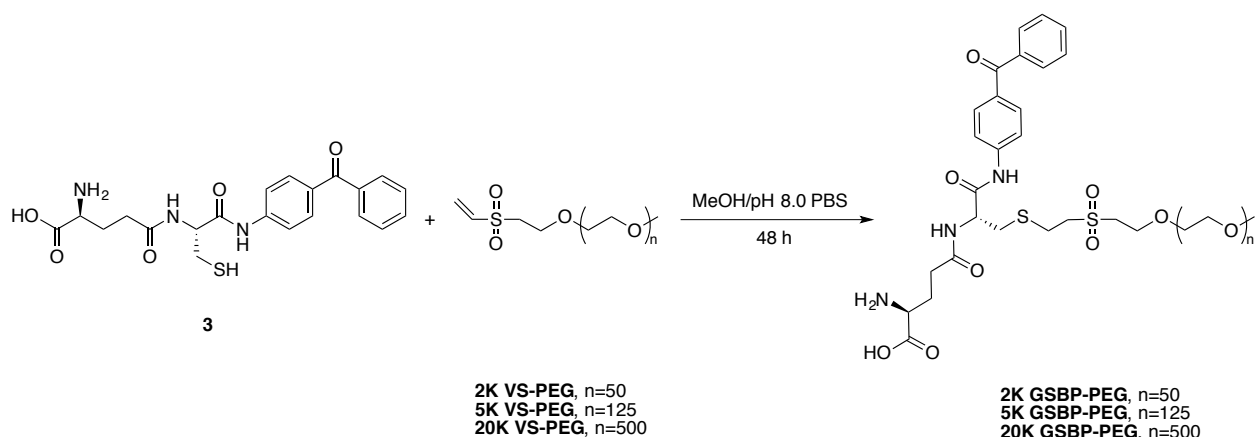

**Synthesis of GSBP-PEG.** Here, we describe the synthesis of 2K GSBP-PEG. 5K and 20K GSBP-PEG were prepared according to the same method. Compound **3** (5.6 mg, 0.013 mmol) was dissolved in MeOH (0.2 mL). In a separate vial, VS-PEG (2K, 8.7 mg,  $4.35 \times 10^{-3}$  mmol) was dissolved in pH 8.0 phosphate buffer saline (0.2 mL). The two solutions were combined, and stirred under argon at 23 °C for 48 h. A small aliquot was taken for crude  $^1\text{H}$  NMR in  $\text{D}_2\text{O}$  to confirm the disappearance of the vinyl peaks. The crude mixture was purified by HPLC with elution gradient of 60%-90% MeOH over 30 min. Alternatively, the crude mixture was purified by dialysis (MWCO 1,000) against  $\text{H}_2\text{O}$  for two days, followed by filtration to remove insoluble solids. The purified solution was then lyophilized to obtain 5.6 mg of white powder with 64% yield.  $^1\text{H}$  NMR of 2K GSBP-PEG (500 MHz in  $\text{D}_2\text{O}$ ) (conversion: 94%)  $\delta$ : 7.88-7.49 (m, 9H), 4.76-4.69 (dd,



$J = 6.20, 8.00$  Hz, 1H), 3.96-3.37 (m, 200H), 3.36-3.34 (s, 3H), 3.20-3.15 (dd,  $J = 6.20, 13.75$  Hz, 1H), 3.05-2.98 (m, 2H), 2.96-2.90 (dd,  $J = 8.20, 13.75$  Hz, 1H), 2.58-2.52 (m, 2H), 2.18-2.10 (m, 2H).  $^1\text{H}$  NMR of 5K GSBP-PEG (500 MHz in  $\text{D}_2\text{O}$ ) (conversion: 100%)  $\delta$ : 7.86-7.48 (m, 9H), 4.75-4.69 (dd,  $J = 6.20, 8.05$  Hz, 1H), 3.96-3.40 (m, 500H), 3.36-3.34 (s, 3H), 3.21-3.14 (dd,  $J = 6.10, 13.70$  Hz, 1H), 3.05-2.98 (m, 2H), 2.96-2.90 (dd,  $J = 8.20, 13.75$  Hz, 1H), 2.58-2.52 (m, 2H), 2.17-2.09 (m, 2H).  $^1\text{H}$  NMR of 20K GSBP-PEG (500 MHz in  $\text{D}_2\text{O}$ ) (conversion: 95%)  $\delta$ : 7.80-7.37 (m, 9H), 4.60-4.56 (m, 1H), 3.98-3.29 (m, 2000H), 3.27-3.25 (s, 3H), 3.08-2.86 (m, 4H), 2.48-2.33 (m, 2H), 2.08-2.96 (m, 2H).

**Scheme S5.** Synthesis of 5K GSDA-PEG.

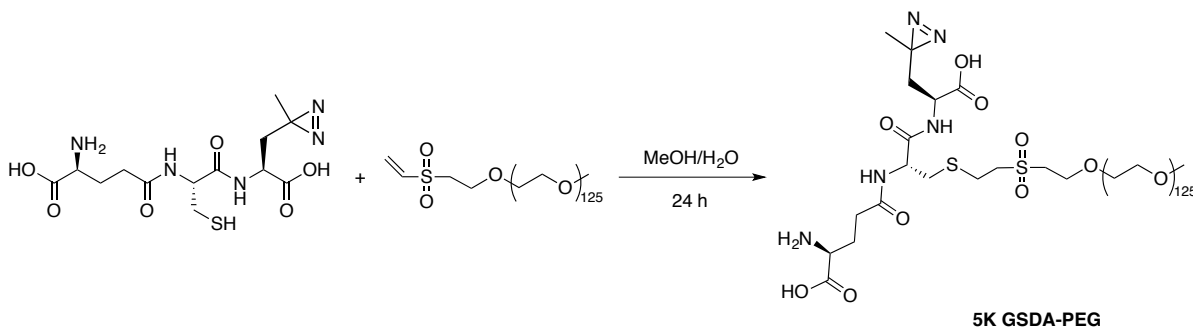

**Synthesis of GSDA-PEG.** GSH-DA (16.6 mg,  $4.4 \times 10^{-2}$  mmol) was dissolved in pH 8.0 phosphate buffer (1 mL). The solution was then added to VS-PEG (5K, 20.4 mg,  $4.1 \times 10^{-3}$  mmol), and the reaction mixture was stirred under Argon at 23 °C for 14 h. A small aliquot for crude  $^1\text{H}$  NMR was taken in  $\text{D}_2\text{O}$  to confirm the disappearance of the vinyl peaks. The crude solution was concentrated via centrifugal filtration (0.5 mL, MWCO 3,000) and washed with  $\text{H}_2\text{O}$  for 5 times. The solution was then collected and

lyophilized.  $^1\text{H}$  NMR (500 MHz in  $\text{D}_2\text{O}$ ) (conversion: 75%)  $\delta$ : 4.55-4.50 (dd,  $J= 5.05$ , 9.20 Hz, 1H), 4.08-4.02 (dd,  $J= 4.20$ , 9.50 Hz, 1H), 3.96-3.36 (m, 500H), 3.28-3.25 (s, 3H), 3.09-3.02 (dd,  $J= 5.00$ , 14.05 Hz, 1H), 2.97-2.89 (m, 2H), 2.88-2.81 (dd,  $J= 9.25$ , 14.05 Hz, 1H), 2.47-2.41 (m, 2H), 2.09-2.01 (m, 2H), 1.98-1.91 (dd,  $J= 4.20$ , 15.15 Hz, 1H), 1.54-1.46 (dd,  $J= 9.55$ , 15.15 Hz, 1H), 0.95-0.90 (s, 3H).

**Scheme S6.** Synthesis of 5K GS-PEG.

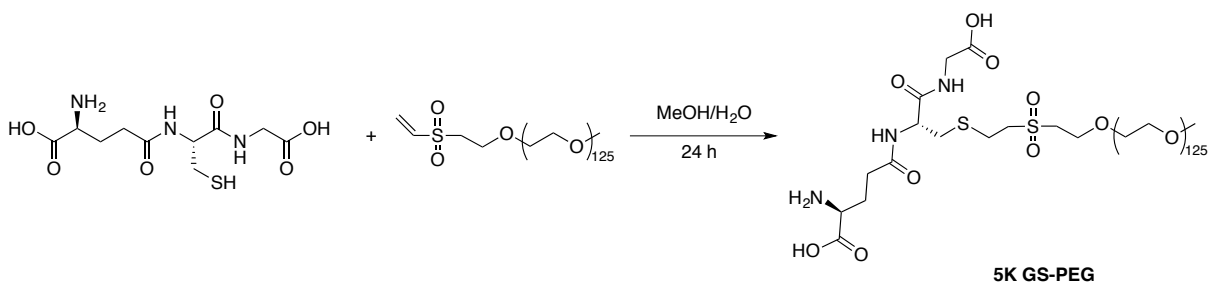

**Synthesis of GS-PEG.** Glutathione (153.7 mg, 0.5 mmol) was dissolved in pH 8.0, D-PBS (2 mL). The pH, which was around 3.0, was adjusted to 8.0 with 1 N NaOH and the total volume was diluted to 2 mL with additional phosphate buffer. The glutathione solution was added to VS-PEG (5K, 250 mg, 0.05 mmol), and the reaction mixture was stirred under argon at 23 °C for 24 h. A small aliquot for crude  $^1\text{H}$  NMR was taken in  $\text{D}_2\text{O}$  to confirm the disappearance of the vinyl peaks. The crude was purified by dialysis (MWCO 1,000) against  $\text{H}_2\text{O}$  for two days, and then lyophilized.  $^1\text{H}$  NMR of 5K GS-PEG (500 MHz in  $\text{D}_2\text{O}$ ) (conversion: 86%)  $\delta$ : 4.52-4.47 (dd,  $J= 5.10$ , 8.50 Hz, 1H), 3.90-3.39 (m, 500H), 3.27-3.23 (s, 3H), 3.05-2.97 (dd,  $J= 4.95$ , 14.10 Hz, 1H), 2.93-2.86 (m, 2H), 2.86-2.78 (dd,  $J= 8.65$ , 14.10 Hz, 1H), 2.47-2.35 (m, 2H), 2.08-1.99 (m, 2H).

**Scheme S7.** Synthesis of 5K BP-PEG.

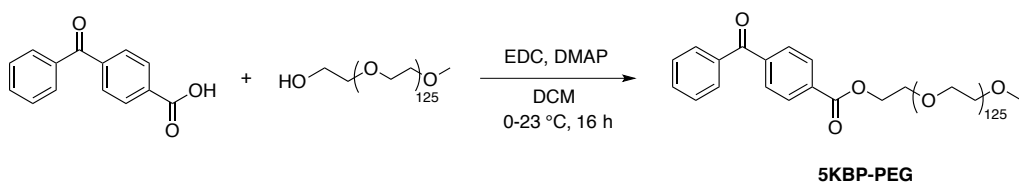

**Synthesis of BP-PEG.** In a round bottom flask over ice, 4-benzoylbenzoic acid (181 mg, 0.8 mmol) was dissolved in DCM (4 mL). EDC·HCl (230.1 mg, 1.2 mmol), poly(ethylene glycol) methyl ether of average  $M_n \sim 5,000$  (200 mg, 0.04 mmol), and DMAP (24.4 mg, 0.2 mmol) were then added to the reaction mixture. The reaction mixture was allowed to stir from 0 °C to 23 °C for 23 h. The crude mixture was washed once with H<sub>2</sub>O, twice with saturated NaHCO<sub>3</sub>, and twice with brine. The organic layer was then dried over MgSO<sub>4</sub> and concentrated *in vacuo*. The solid was purified by dialysis (MWCO 1,000) against H<sub>2</sub>O for two days, followed by 0.22 μm PTFE syringe filtration to remove insoluble solids. The purified solution was then lyophilized. <sup>1</sup>H NMR (500 MHz in D<sub>2</sub>O) (conversion: 100%) δ: 8.12-7.46 (m, 9H), 4.47-4.42 (m, 2H), 3.85-3.40 (m, 500H), 3.29-3.24 (s, 3H).

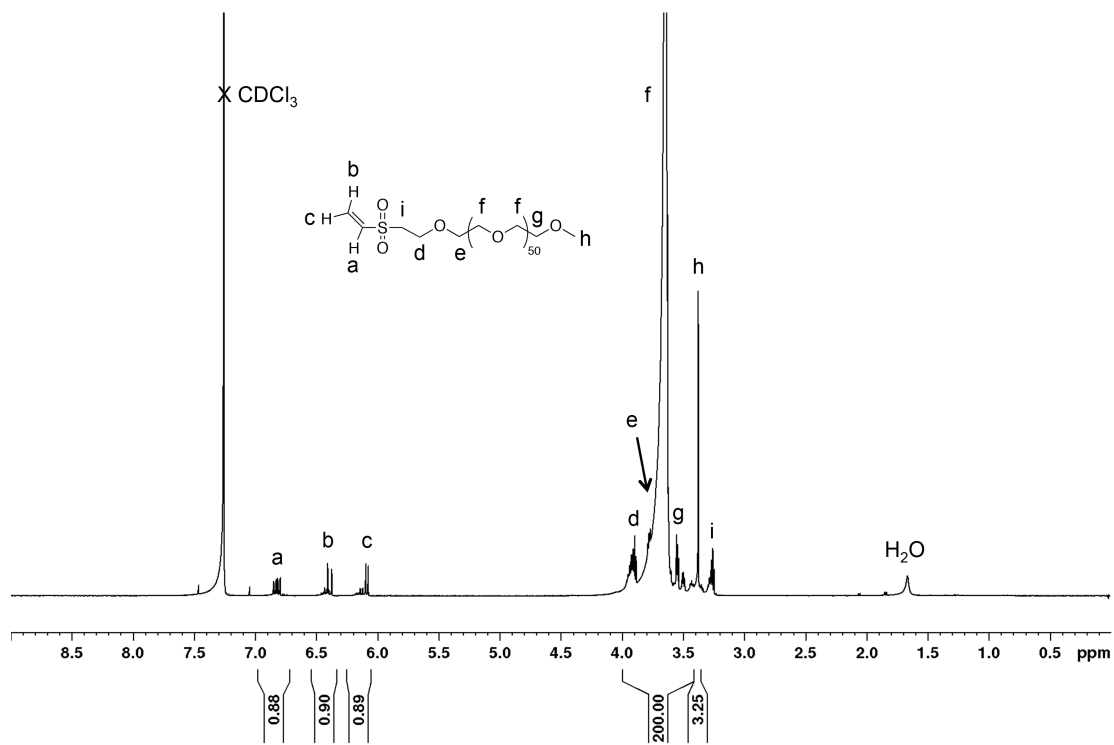

**Figure S9.**  $^1\text{H}$  NMR spectrum of 2K VS-PEG (in  $\text{CDCl}_3$ ).

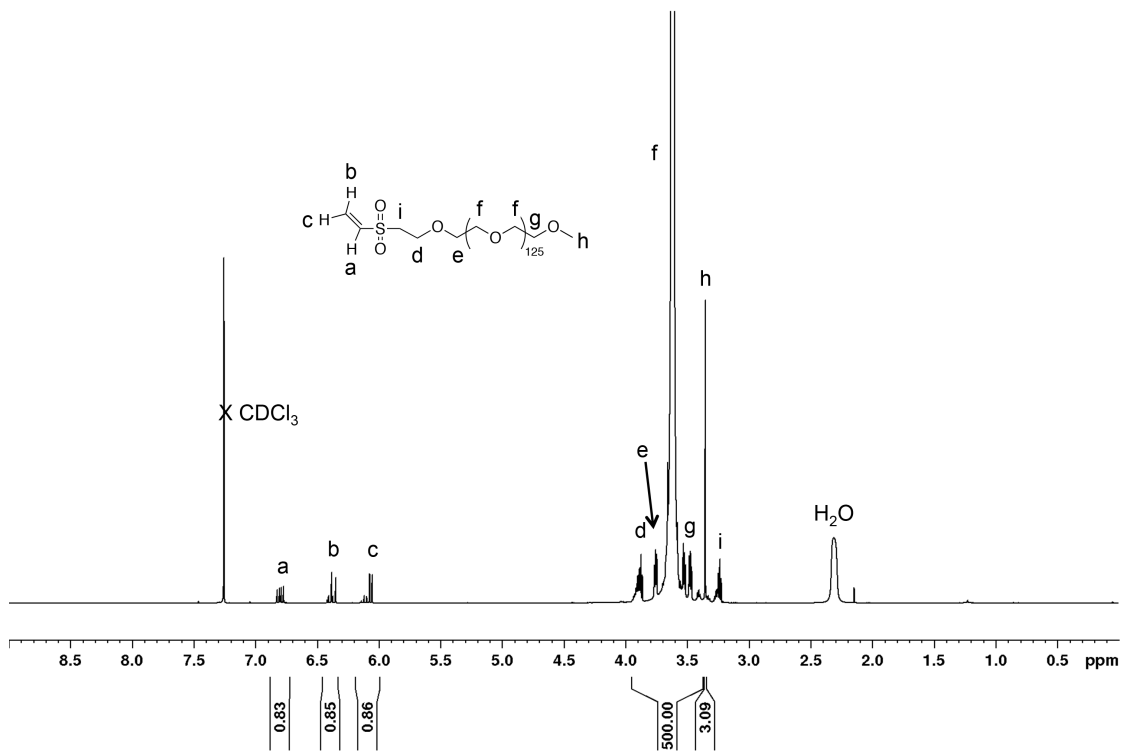

**Figure S10.**  $^1\text{H}$  NMR spectrum of 5K VS-PEG (in  $\text{CDCl}_3$ ).

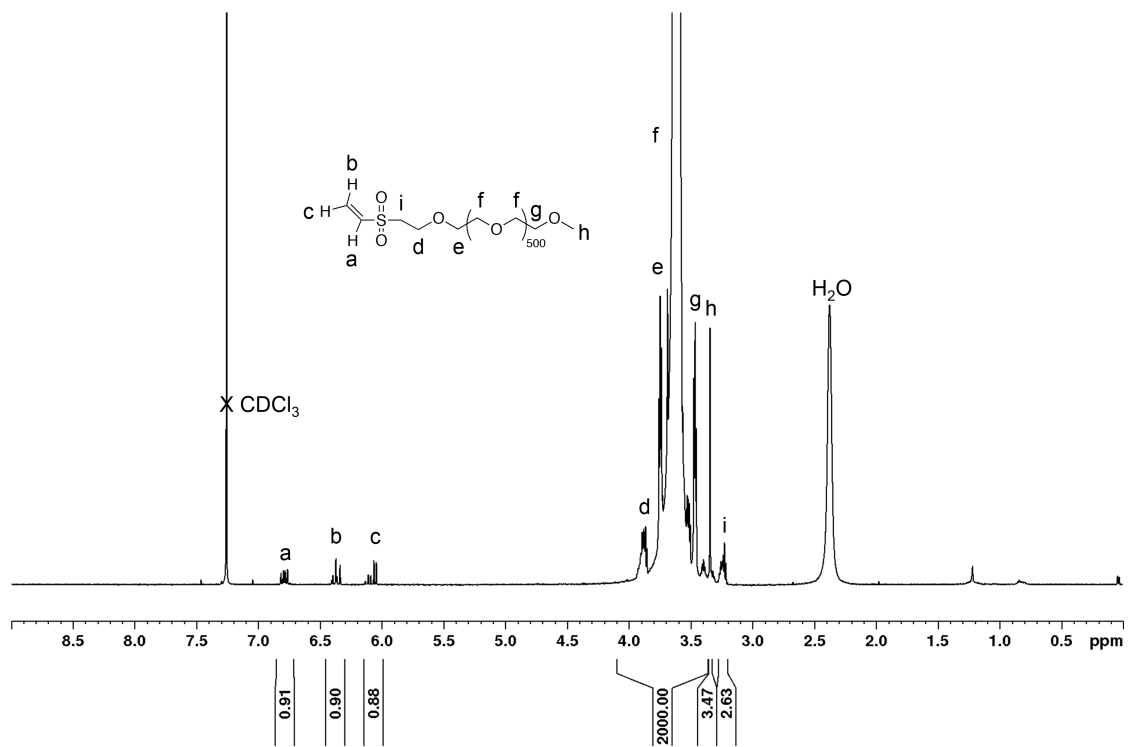

**Figure S11.**  $^1\text{H}$  NMR spectrum of 20K VS-PEG (in  $\text{CDCl}_3$ ).

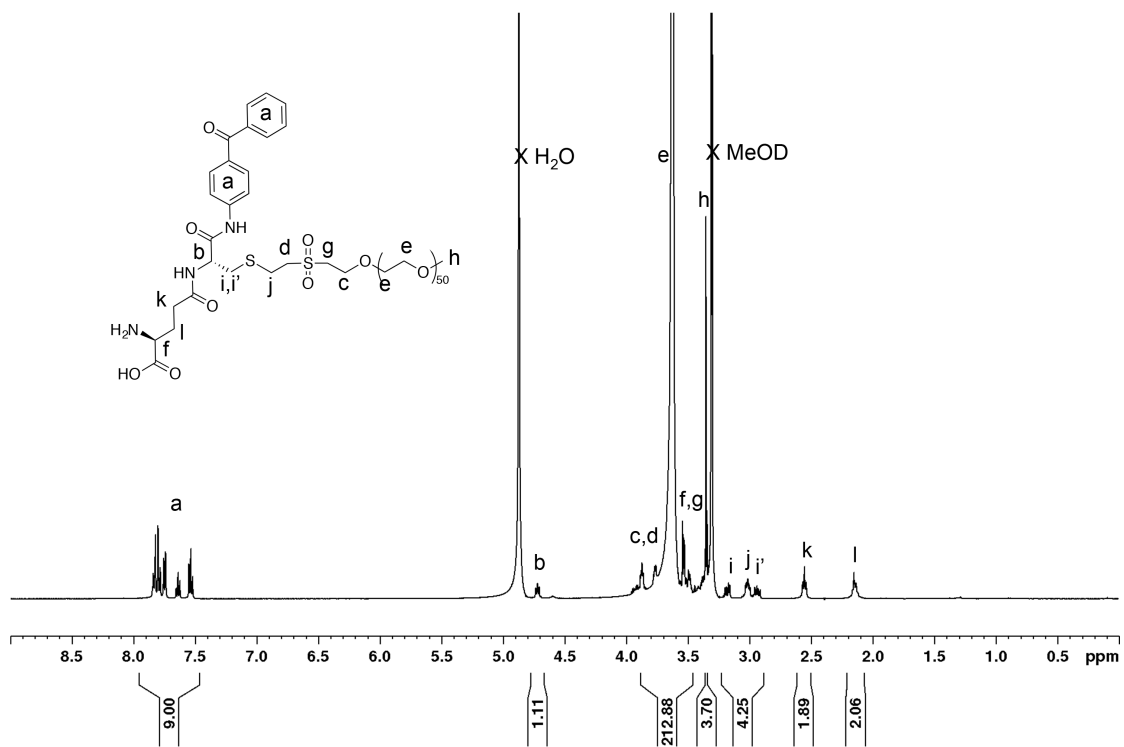

Figure S12.  $^1\text{H}$  NMR spectrum of 2K GSBP-PEG (in MeOD).

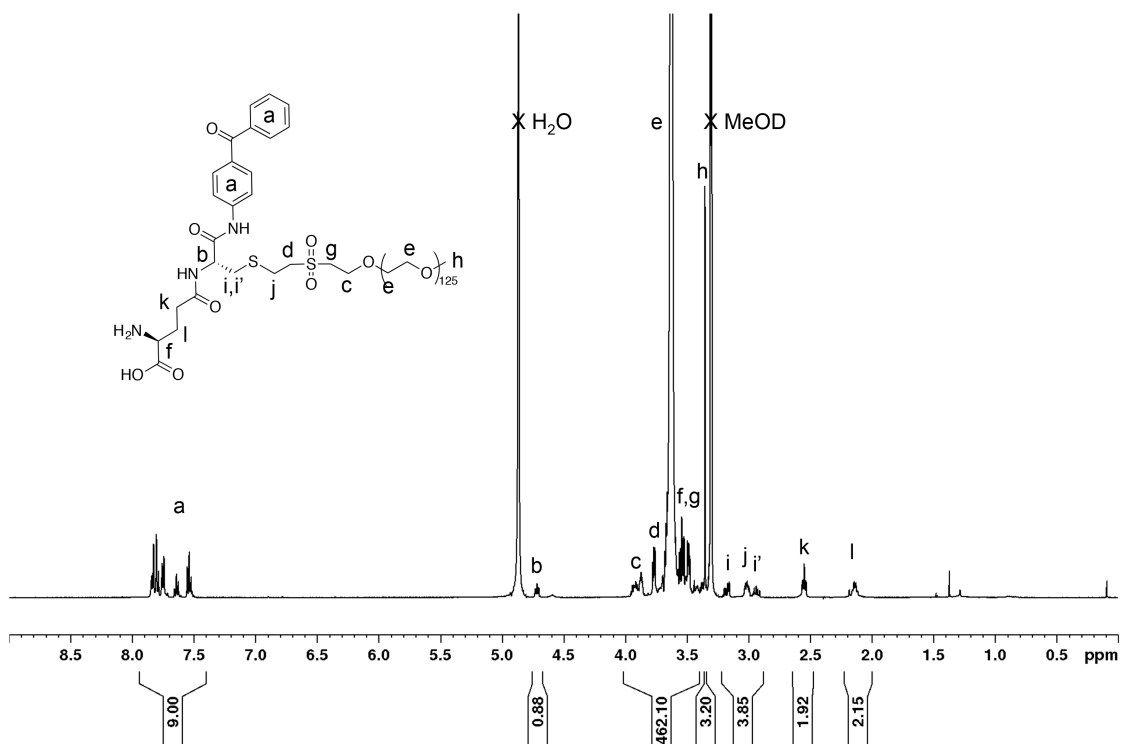

Figure S13.  $^1\text{H}$  NMR spectrum of 5K GSBP-PEG (in  $\text{CDCl}_3$ ).

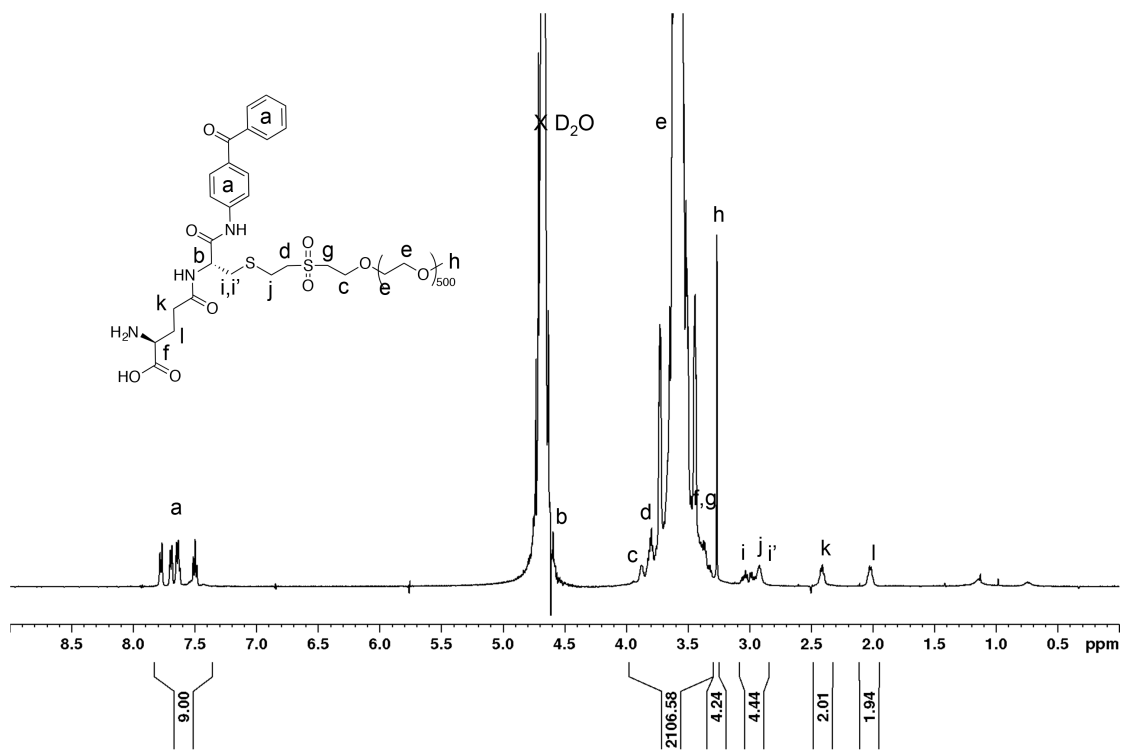

**Figure S14.** <sup>1</sup>H NMR spectrum of 20K GSBP-PEG (in MeOD).



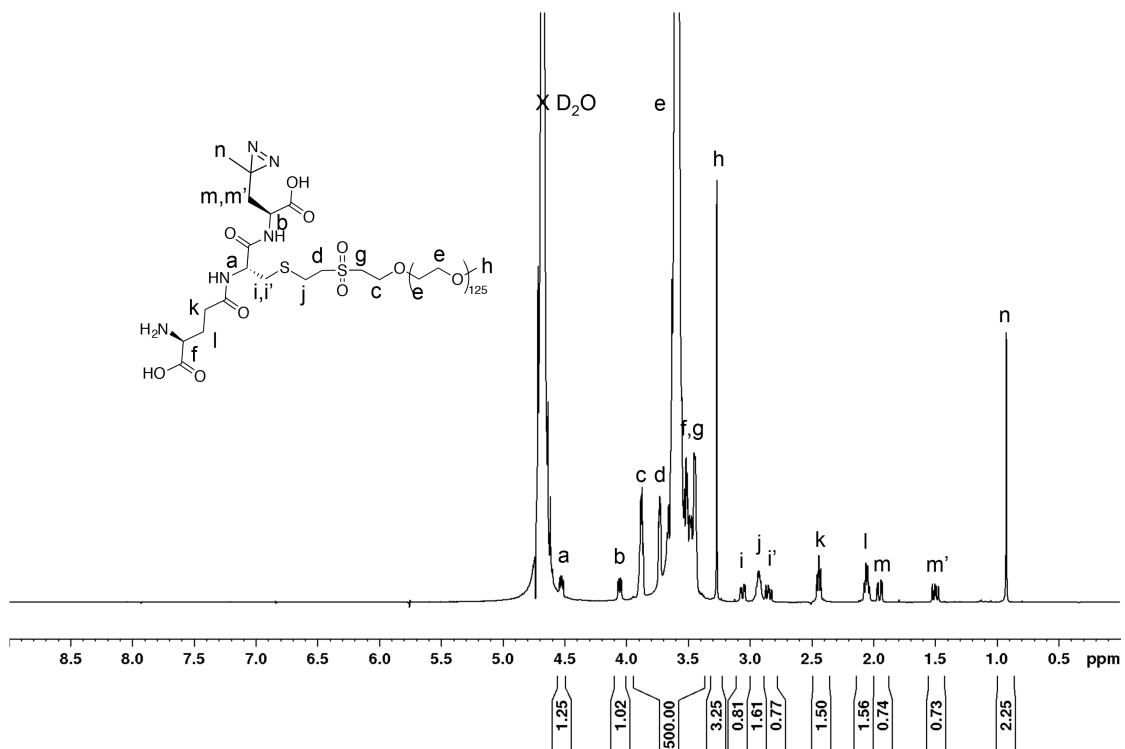

**Figure S15.** <sup>1</sup>H NMR spectrum of 5K GSDA-PEG (in D<sub>2</sub>O).

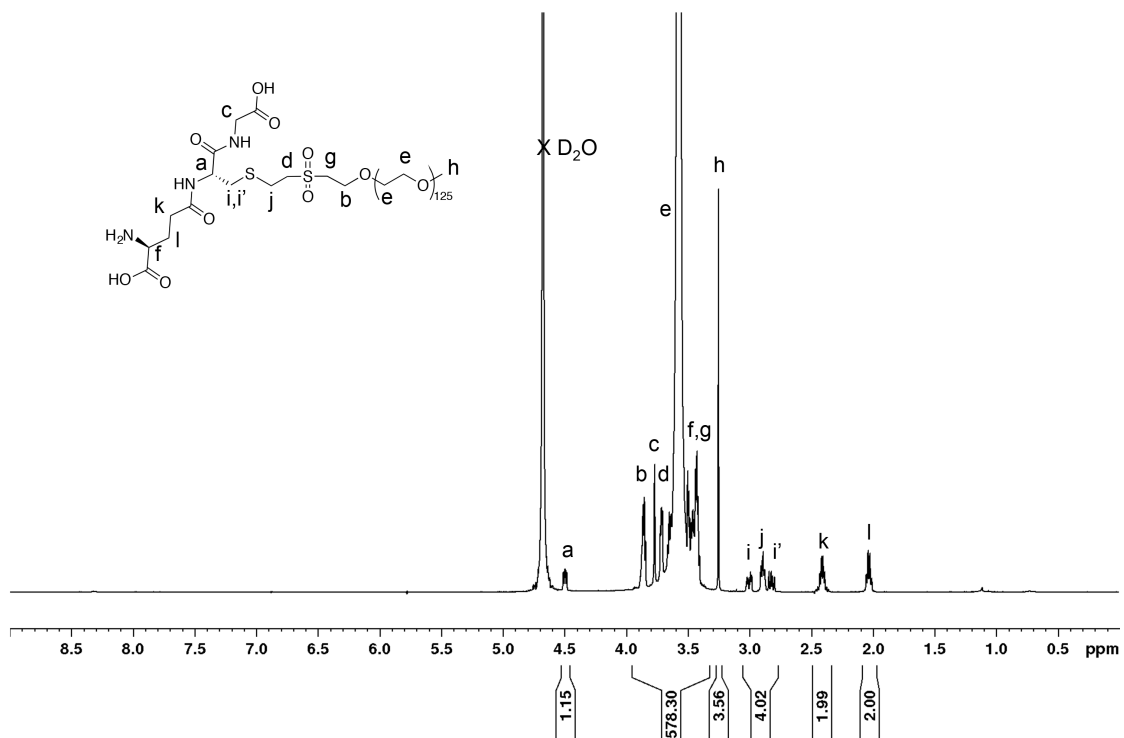

**Figure S16.** <sup>1</sup>H NMR spectrum of 5K GS-PEG (in D<sub>2</sub>O).

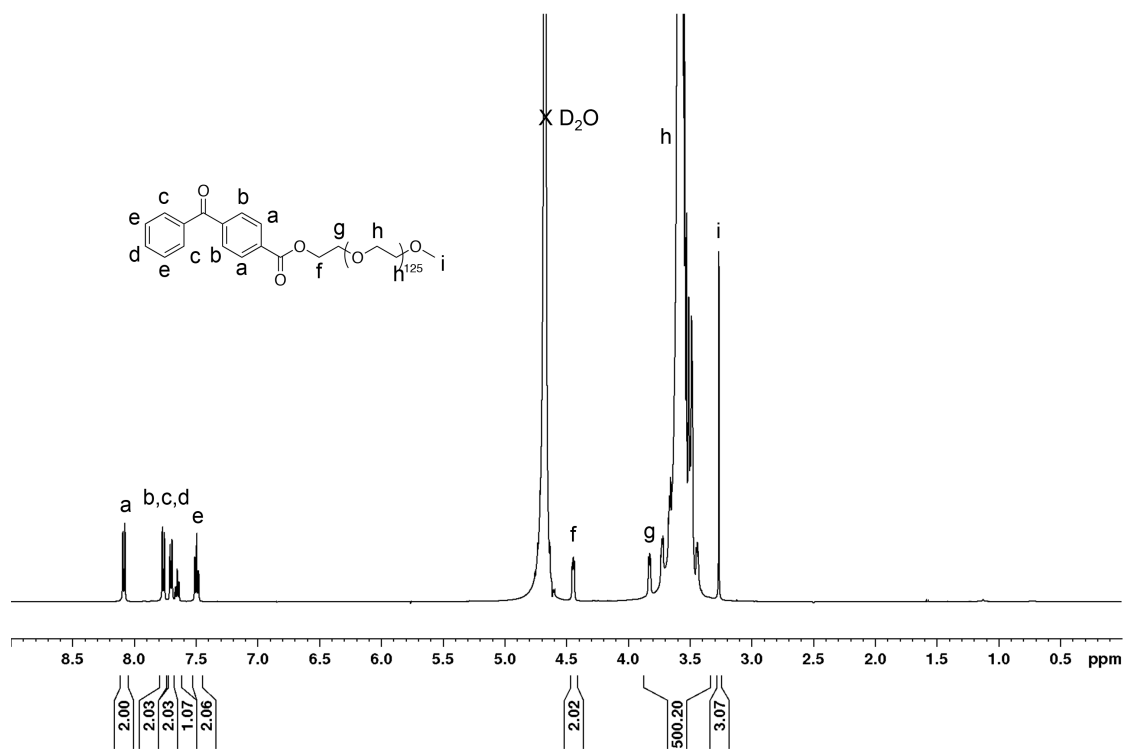

**Figure S17.**  $^1\text{H}$  NMR spectrum of 5K BP-PEG (in  $\text{D}_2\text{O}$ ).

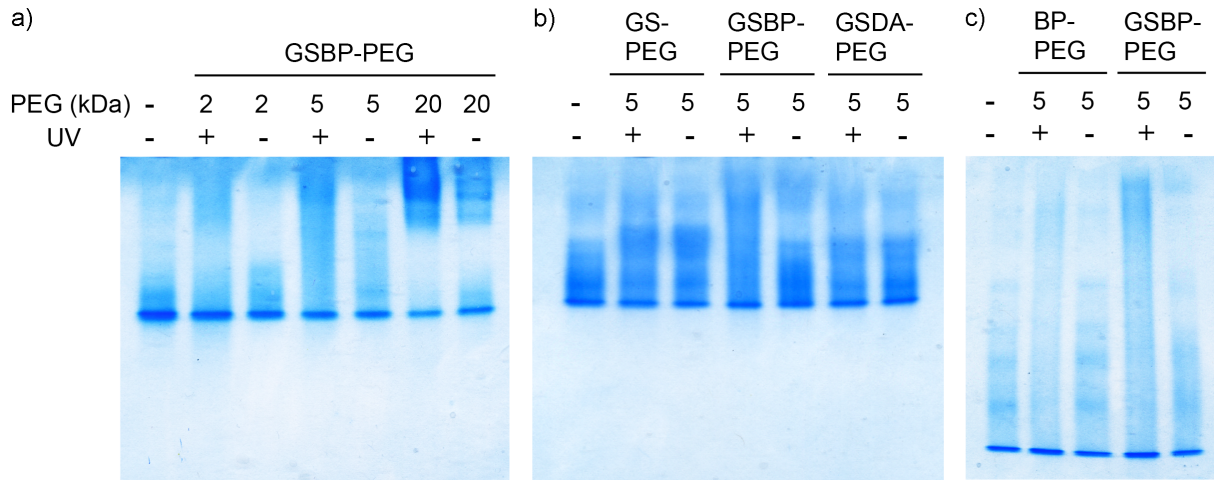

**Figure S18.** Native PAGE of a) GSBP-PEG conjugation to GST; b) comparison between GS-PEG, 5K GSBP-PEG, and GSDA-PEG; c) comparison between BP-PEG and 5K GSBP-PEG.

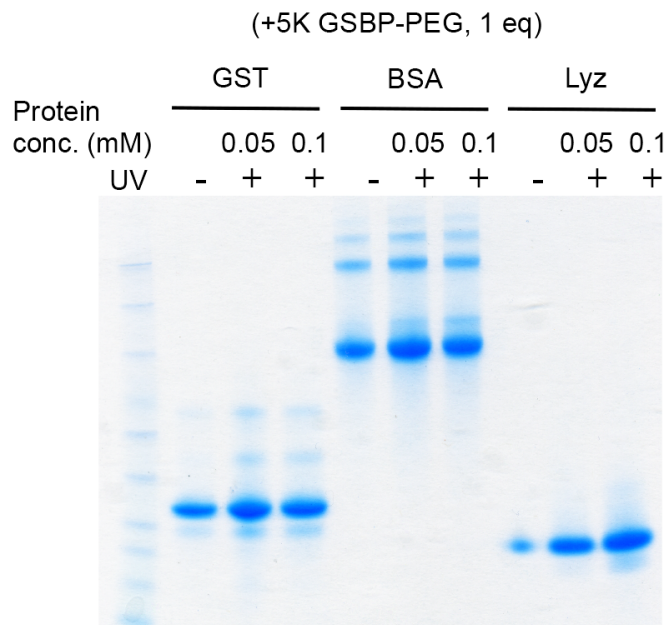

**Figure S19.** SDS-PAGE of the conjugation of 5K GSBP-PEG to GST, BSA, and Lyz at low concentrations. No conjugation is observed for Lyz.

## References:

- (1) Vila-Perello, M.; Pratt, M. R.; Tulin, F.; Muir, T. W. (2007) Covalent capture of phospho- dependent protein oligomerization by site-specific incorporation of a diazirine photo- cross-linker. *J. Am. Chem. Soc.*, *129*, 8068-8069.
- (2) Barlos, K.; Gatos, D.; Kallitsis, J.; Papaphotiu, G.; Sotiriu, P.; Wenqing, Y.; Schäfer, W. (1989) Darstellung geschützter peptid-fragmente unter einatz substituierter triphenylmethyl-harze. *Tetrahedron Lett.*, *30*, 3943-3946.
- (3) Ladd, D. L.; Snow, R. A. Sterling Winthrop Inc. (1995) Vinyl sulfone coupling of polyoxylalkylenes to proteins, US Patent No US5414135-A.
